# Supplementary material
Source: MDPI journal article supplement (https://www.mdpi.com/2075-4655/8/1/6)
Supplement: s1 [file s1]

Review

# Orchestrating Asymmetric Expression: Mechanisms behind *Xist* Regulation

Samuel Jesus Luchsinger-Morcelle, Joost Gribnau and Hegias Mira-Bontenbal \*

Department of Developmental Biology, Erasmus MC, University Medical Center,  
3015 GD Rotterdam, The Netherlands; s.luchsingermorcelle@erasmusmc.nl (S.J.L.-M.);  
j.gribnau@erasmusmc.nl (J.G.)

\* Correspondence: h.mirabontenbal@erasmusmc.nl

**Supplementary Table S1.** Overview of the different factors involved in *Xist* expression control in mouse ESCs in rXCI.

| Factor               | Category             | Coding    | Regulation on <i>Xist</i> | Mode of action on <i>Xist</i>                                                                                      |
|----------------------|----------------------|-----------|---------------------------|--------------------------------------------------------------------------------------------------------------------|
| P1                   | DNA element          | X linked  | Upregulation              | Directly                                                                                                           |
| P2                   | DNA element          | X linked  | Upregulation              | Directly                                                                                                           |
| P0                   | DNA element          | X linked  | Upregulation              | Directly–alternative unstable <i>Xist</i> transcripts                                                              |
| <i>Xist</i> Intron 1 | DNA element          | X linked  | Downregulation            | Directly                                                                                                           |
| RE79                 | DNA element          | X linked  | Upregulation              | Directly                                                                                                           |
| RE93-97              | DNA element          | X linked  | Upregulation              | Directly<br>Indirectly via <i>Xert</i> upregulation                                                                |
| OCT4                 | Transcription Factor | Autosomal | Downregulation            | Directly via <i>Xist</i> intron 1<br>Indirectly via <i>Tsix</i> and <i>Xite</i> upregulation, RNF12 downregulation |
| SOX2                 | Transcription Factor | Autosomal | Downregulation            | Directly via <i>Xist</i> intron 1<br>Indirectly via <i>Tsix</i> and <i>Xite</i> upregulation, RNF12 downregulation |
| NANOG                | Transcription Factor | Autosomal | Downregulation            | Directly via <i>Xist</i> intron 1<br>Indirectly via <i>Tsix</i> upregulation, <i>Rnf12</i> downregulation          |
| REX1                 | Transcription Factor | Autosomal | Downregulation            | Directly<br>Indirectly via <i>Tsix</i> upregulation                                                                |
| KLF4                 | Transcription Factor | Autosomal | Downregulation            | Indirectly via <i>Tsix</i> upregulation                                                                            |
| C-MYC                | Transcription Factor | Autosomal | Downregulation            | Indirectly via <i>Tsix</i> upregulation                                                                            |

|             |                                   |           |                |                                                                                                                          |
|-------------|-----------------------------------|-----------|----------------|--------------------------------------------------------------------------------------------------------------------------|
| PRDM14      | Transcription Factor              | Autosomal | Downregulation | Directly via <i>Xist</i> intron 1?<br>Indirectly via <i>Rnf12</i> downregulation?                                        |
| CTCF        | Transcription Factor              | Autosomal | Downregulation | Directly<br>Indirectly via <i>Tsix</i> upregulation                                                                      |
| YY1         | Transcription Factor              | Autosomal | Upregulation   | Directly<br>Indirectly via <i>Tsix</i> downregulation                                                                    |
| GATA2/3/4/6 | Transcription Factor              | Autosomal | Upregulation   | Indirectly via RE79/93-97                                                                                                |
| CHD8        | Chromatin remodeller              | Autosomal | Complex        | Directly via accessibility modification of <i>Xist</i> promoter                                                          |
| KAP1        | Scaffold protein                  | Autosomal | Downregulation | Indirectly via competition with RIF1 and <i>Tsix</i> stabilisation                                                       |
| RIF1        | Multifaceted protein              | Autosomal | Upregulation   | Directly                                                                                                                 |
| MSL2/MOF    | Histone acetyltransferase complex | Autosomal | Downregulation | Indirectly via H4K16ac deposition at <i>DxPas34</i> , YY1 recruitment to <i>Tsix</i> promoter and REX1 to <i>DxPas34</i> |
| SPEN        | Chromatin remodeller              | Autosomal | Upregulation   | Indirectly via <i>Tsix</i> downregulation                                                                                |
| RNF12       | E3 ubiquitin ligase               | X-Linked  | Upregulation   | Indirectly via REX1 degradation                                                                                          |
| GATA1       | Transcription Factor              | X-Linked  | Upregulation   | Indirectly via <i>Gata6</i> upregulation?                                                                                |
| KDM5C       | H3K4 demethylase                  | X-Linked  | Upregulation   | Directly via <i>Xist</i> promoter H3K4 demethylation                                                                     |
| KDM6A       | H3K27 demethylase                 | X-Linked  | Upregulation   | Directly via <i>Xist</i> promoter H3K27 demethylation?                                                                   |
| <i>Tsix</i> | LncRNA                            | X-Linked  | Downregulation | Direct via transcription through <i>Xist</i> promoter                                                                    |
| <i>Xite</i> | LncRNA                            | X-Linked  | Downregulation | Indirectly via <i>Tsix</i> upregulation–enhancer-like function                                                           |
| <i>Tsx</i>  | LncRNA                            | X-Linked  | Downregulation | Indirectly via <i>Tsix</i> upregulation?                                                                                 |

|                   |             |          |                                    |                                                                                                                                                                                                                                                                                                          |
|-------------------|-------------|----------|------------------------------------|----------------------------------------------------------------------------------------------------------------------------------------------------------------------------------------------------------------------------------------------------------------------------------------------------------|
| <i>Linx/Lppnx</i> | LncRNA      | X-Linked | Downregulation                     | Unclear/Direct <i>Xist</i> downregulation via intron 1- <i>DxPas34</i> /OCT4-REX1                                                                                                                                                                                                                        |
| <i>Jpx</i>        | LncRNA      | X-Linked | Upregulation                       | Unclear, RNA in <i>cis/trans?</i> at posttranscriptional level of <i>Xist?</i>                                                                                                                                                                                                                           |
| <i>Ftx</i>        | LncRNA      | X-Linked | Upregulation                       | Directly via promoter-promoter interactions, decreased DNA methylation at <i>Xist</i> promoter                                                                                                                                                                                                           |
| <i>Xert</i>       | LncRNA      | X-Linked | Upregulation                       | Directly via enhancer-like function                                                                                                                                                                                                                                                                      |
| H3K27me1          | Histone PTM | N/A      | Downregulation                     | Direct <i>Xist</i> downregualtion via <i>Xist</i> promoter heterochromatinisation                                                                                                                                                                                                                        |
| H3K27me3          | Histone PTM | N/A      | Downregulation<br><br>Upregulation | Direct <i>Xist</i> downregualtion via <i>Xist</i> promoter heterochromatinisation<br>Indirect <i>Xist</i> downregulation via <i>Jpx</i> , <i>Ftx</i> , and <i>Xert</i> heterechromatinisation<br>Indirect <i>Xist</i> upregulation via <i>Xite</i> , <i>Tsx</i> , and <i>Linx</i> heterechromatinisation |
| H4K20me2          | Histone PTM | N/A      | Downregulation                     | Directly via promoter heterochromatinisation                                                                                                                                                                                                                                                             |
| H3K9me2           | Histone PTM | N/A      | Downregulation                     | Directly via promoter heterochromatinisation                                                                                                                                                                                                                                                             |
| H3K9me3           | Histone PTM | N/A      | Downregulation                     | Directly via promoter heterochromatinisation                                                                                                                                                                                                                                                             |
| H3K36me3          | Histone PTM | N/A      | Downregulation                     | Directly via promoter heterochromatinisation                                                                                                                                                                                                                                                             |
| H3K4me2           | Histone PTM | N/A      | Upregulation                       | Directly via promoter euchromatinisation                                                                                                                                                                                                                                                                 |

|                 |                            |     |                                                                    |                                                                                                                                                                                                                                                                                                             |
|-----------------|----------------------------|-----|--------------------------------------------------------------------|-------------------------------------------------------------------------------------------------------------------------------------------------------------------------------------------------------------------------------------------------------------------------------------------------------------|
| H3K27ac         | Histone PTM                | N/A | Downregulation<br><br><br><br><br><br><br><br><br><br>Upregulation | Indirect <i>Xist</i> downregulation by <i>Tsix</i> , <i>Linx</i> , <i>Xite</i> , and <i>Tsx</i> heterochromatinization<br>Direct <i>Xist</i> upregulation via <i>Xist</i> promoter euchromatinisation<br>Indirect <i>Xist</i> upregulation via <i>Jpx</i> , <i>Ftx</i> , and <i>Xert</i> euchromatinisation |
| H3K4me3         | Histone PTM                | N/A | Downregulation<br><br><br><br><br><br><br><br><br><br>Upregulation | Indirect <i>Xist</i> downregulation by <i>Tsix</i> , <i>Linx</i> , <i>Xite</i> , and <i>Tsx</i> heterochromatization<br>Direct <i>Xist</i> upregulation via <i>Xist</i> promoter euchromatization<br>Indirect <i>Xist</i> upregulation via <i>Jpx</i> , <i>Ftx</i> , and <i>Xert</i> euchromatinisation     |
| DNA methylation | DNA methylation            | N/A | Downregulation                                                     | Directly                                                                                                                                                                                                                                                                                                    |
| <i>Tsix</i> TAD | Higher chromatin structure | N/A | N/A                                                                | Ensuring <i>Tsix</i> expression in the pluripotent state                                                                                                                                                                                                                                                    |
| <i>Xist</i> TAD | Higher chromatin structure | N/A | N/A                                                                | Ensuring timely expression of <i>Xist</i> upon exit of pluripotency                                                                                                                                                                                                                                         |

**Disclaimer/Publisher's Note:** The statements, opinions and data contained in all publications are solely those of the individual author(s) and contributor(s) and not of MDPI and/or the editor(s). MDPI and/or the editor(s) disclaim responsibility for any injury to people or property resulting from any ideas, methods, instructions or products referred to in the content.
